3-DA on SAHH, we used *S*-adenosylhomocysteine (SAH) as a substrate at 50  $\mu\text{mol/L}$  and 3-DA at 0, 50, 100, and 200  $\mu\text{mol/L}$  in the assay buffer. Conversion of SAH to adenosine and Hcy was measured by its subsequent conversion to  $\text{H}_2\text{S}$  by rHCYase with colorimetric measurement at 675 nm using *N,N*-dibutylphenylenediamine hydrochloride as the chromophore (5, 6). When 3-DA was added from 0 to 200  $\mu\text{mol/L}$ , the remaining activity decreased from 100% to 3.3% (Fig. 1). These results confirm the report of Woltersdorf et al. (4), who found highly significant interference by 3-DA, starting from 50  $\mu\text{mol/L}$ , in the Abbott IMx Hcy assay, which is based on SAHH.

To determine the interference of 3-DA directly on rHCYase, we used 50  $\mu\text{mol/L}$  L-Hcy with 3-DA at 0, 50, 100, or 200  $\mu\text{mol/L}$  in the assay buffer. At 3-DA concentrations ranging from 0 to 200  $\mu\text{mol/L}$ , the relative activity showed almost no change (<4.5%), a striking contrast to the interference of 3-DA on SAHH (Fig. 1). For 10 plasma samples with and without 100  $\mu\text{mol/L}$  3-DA, measured with the rHCYase-based tHcy assay (5, 6), the mean (SD) tHcy was 10.4 (2.2)  $\mu\text{mol/L}$  with 3-DA and 10.6 (2.3)  $\mu\text{mol/L}$  without 3-DA. The concentrations measured by a HPLC tHcy assay (5, 6) were 10.7 (2.1)  $\mu\text{mol/L}$  with 3-DA and 10.8 (2.0)  $\mu\text{mol/L}$  without 3-DA.

We conclude that the SAHH-based assay is completely interfered by 3-DA at the concentrations needed to stabilize tHcy in whole blood, whereas the rHCYase-based tHcy assay is unaffected (5, 6). Thus, the remaining technical problem for routine and widespread tHcy measurement, the long-term storage of whole blood, can be solved with the use of 3-DA and the rHCYase-based tHcy assay.

## References

1. Refsum H, Smith AD, Ueland PM, Nexø E, Clarke R, McPartlin J, et al. Facts and recommendations about total homocysteine determinations: an expert opinion. *Clin Chem* 2004;50:3–32.
2. Fiskerstrand T, Refsum H, Kvalheim G, Ueland PM. Homocysteine and other thiols in plasma and urine: automated determination and sample stability. *Clin Chem* 1993;39:263–71.
3. Hill D, Johnson L, Burns P, Neale A, Harmening

DM, Kenney AC. Effects of temperature on stability of blood homocysteine in collection tubes containing 3-deazaadenosine. *Clin Chem* 2002;48:2017–22.

4. Woltersdorf WW, Bowron A, Day AP, Scott J, Stansbie D. Abbott IMx homocysteine assay: significant interference by 3-deazaadenosine [Letter]. *Ann Clin Biochem* 1999;36:533.
5. Tan Y, Tang L, Sun X, Zhang N, Han Q, Xu M, et al. Total-homocysteine enzymatic assay. *Clin Chem* 2000;46:1686–8.
6. Tan Y, Sun X, Tang L, Zhang N, Han Q, Xu M, et al. Automated enzymatic assay for homocysteine. *Clin Chem* 2003;49:1029–30.

Qinghong Han  
Xinghua Sun  
Mingxu Xu  
Nan Zhang  
Li Tang  
Yuying Tan  
Robert M. Hoffman\*

A/C Diagnostics LLC  
and AntiCancer, Inc.  
San Diego, CA

\*Address correspondence to this author at: AntiCancer, Inc., 7917 Ostrow St., San Diego, CA 92111. Fax 858-268-4175; e-mail all@anticancer.com.

DOI: 10.1373/clinchem.2004.036483

## Comparison of Serum and Heparinized Plasma Samples for Measurement of Chemistry Analytes

### To the Editor:

Although serum and heparinized plasma specimens are considered equivalent for many assays, differences in results between these two sample types have been reported for several chemistry analytes. Significant differences between serum and heparinized plasma results have been reported for albumin, alkaline phosphatase, calcium, carbon dioxide, chloride, creatine kinase, glucose, lactate dehydrogenase (LD), inorganic phosphorus, potassium, and total protein (1). The concentration differences in results for calcium, glucose, inorganic phosphorus, potassium, and total protein between serum and heparinized plasma were felt to be large enough to affect clinical interpretation in certain instances. The aim of this study was to

compare results from serum and heparinized plasma samples for 45 different chemistry tests.

Twenty apparently healthy volunteers who had been fasting for 12–14 h had serum and lithium-heparin specimens collected in that standard draw order during a single venipuncture. All studies conducted with human samples were approved by the Institutional Review Board of the University of Utah. The samples were centrifuged, serum and plasma were separated from cells within 1 h of collection, and 1-mL aliquots were frozen within 2 h of collection and stored at  $-70^\circ\text{C}$  for up to 8 months. Before analysis, the aliquots were thawed and mixed well. Matched aliquots of serum and heparinized plasma were analyzed within 4 h of thawing. The serum samples were analyzed sequentially, followed immediately by sequential analysis of the heparin-plasma samples. Alanine aminotransferase, albumin, alkaline phosphatase, aspartate aminotransferase, calcium, carbon dioxide, chloride, cholesterol, creatinine,  $\gamma$ -glutamyltranspeptidase, glucose, LD, potassium, phosphorus, sodium, total bilirubin, total protein, urea nitrogen, and uric acid were analyzed on both a Roche Modular P analyzer and a Vitros 950 analyzer. Additional assays for aldolase,  $\alpha_1$ -antitrypsin, amylase, angiotensin-converting enzyme (ACE), bile acids, direct bilirubin, ceruloplasmin, complement C4, complement C3, high-sensitivity C-reactive protein, creatine kinase, fructosamine, HDL-cholesterol, haptoglobin, iron, lipoprotein(a), lipase, LDL-cholesterol, magnesium, prealbumin, pancreatic amylase, phospholipids, transferrin, triglycerides, total iron-binding capacity, and unbound iron-binding capacity were performed only on the Roche Modular P analyzer. All reagents were from the instrument manufacturers unless otherwise stated in Table 1 of the Data Supplement that accompanies the online version of this letter at <http://www.clinchem.org/content/vol50/issue9/>.

Differences in the mean values for the two sample types were compared by paired *t*-test and were considered

clinically significant at 2% for sodium; 5% for calcium, chloride, glucose, and potassium; and 10% for all other analytes tested (2). A statistical summary of all data is provided in Table 1 of the online Data Supplement.

On the Roche analyzer, heparinized plasma samples showed clinically significant decreases relative to serum samples for bile acids (−67%) and potassium (−6.0%). Clinically significant increases were seen for aldolase (+39%), ACE (+22%), and LD (+21%). According to the manufacturers' assay package inserts, both serum and heparinized plasma samples are acceptable for ACE, aldolase, bile acids, LD, and potassium.

On the Vitros 950 analyzer, similar changes were seen in the concentrations reported for potassium (9.3% decrease) and LD (19% increase) in the plasma samples relative to the serum samples. In addition, mean total bilirubin results were 20% higher in the plasma samples on this analyzer. Both serum and heparinized plasma samples are acceptable for each of these assays according to the manufacturer's assay information.

Concentration differences of comparable magnitude between serum and plasma samples were identified on both analyzers for potassium and LD. Lower potassium concentrations in plasma samples have been well described and are attributed to the prevention of clot formation with platelet rupture and potassium release (3,4). Some reports have shown differences in LD values between serum and heparinized plasma samples (1), whereas others have not (3,5,6). Bakker et al. (7) initially reported an increase in duplicate errors in LD measurements on plasma samples, but this was later attributed to the method of primary tube sampling (8,9). Falsely increased plasma LD concentrations may be caused by contamination with erythrocytes or platelets, which contain high concentrations of LD. Others have suggested that LD is falsely increased in the preparation of serum because of increased hemolysis and platelet release of LD with

clot formation (7). Both sample types are acceptable according to the manufacturers of both instruments we tested. The fact that our samples were frozen before analysis may have contributed to release of LD from residual erythrocytes and/or platelets.

Other limitations of the current study are that a standard draw order was used for specimen collection and that first serum and then plasma samples were analyzed sequentially. Random collection and analysis orders are generally preferred, although in this case the standard non-randomized order is unlikely to have affected the results.

Two previous studies comparing heparinized plasma and serum found no difference for total bilirubin (1,10), whereas a third study showed a difference that was statistically different but not clinically significant (3). We examined only low total bilirubin concentrations, using samples from healthy individuals, and found a clinically significant difference only for the Vitros 950 method. It is possible that the difference between serum and heparin-plasma samples with this method is a constant amount and that for samples with abnormally high total bilirubin, no significant difference would be seen. This hypothesis requires formal testing.

In contrast to a previous report (1), values for glucose concentrations were comparable between the two sample types on both analyzers. It has been suggested that glucose concentrations are lower in plasma than in serum as a result of a fluid shift from erythrocytes to plasma caused by anticoagulants (11). Our study demonstrates that serum and heparin plasma are comparable samples types. Separation of cellular components from serum or plasma should be performed within 60 min, as currently recommended (11).

Our data suggest that serum and heparinized plasma samples give results that differ enough to alter clinical decision-making in some assays, including several for which the two specimen types are considered equivalent by the assay manufac-

turers. For potassium, both serum and plasma reference intervals are readily available, and plasma is the preferred sample type. For the other assays, we recommend that only serum samples be accepted. Alternatively, separate reference intervals for plasma samples will need to be established.

This work was supported by the ARUP Institute for Clinical & Experimental Pathology.

## References

1. Ladenson JH, Tsai LMB, Michael JM, Kessler G, Joist JH. Serum versus heparinized plasma for eighteen common chemistry tests. *Am J Clin Pathol* 1974;62:545–52.
2. Proctor KAS, Rao, LV, Roberts WL. Gadolinium magnetic resonance contrast agents produce analytic interference in multiple serum assays. *Am J Clin Pathol* 2004;121:282–92.
3. Doumas BT, Hause LL, Simuncak DM, Bretienfeld D. Differences between values for plasma and serum in tests performed in the Ektachem 700 XR Analyzer, and evaluation of plasma separator tubes (PST). *Clin Chem* 1989;35:151–3.
4. Burtis CA, Ashwood ER, eds. *Tietz textbook of clinical chemistry*, 3rd ed. Philadelphia: WB Saunders Co, 1999:1058–9.
5. Lum G. Unreliability of immunochemical determination of lactate dehydrogenase isoenzyme-1 in heparinized plasma. *Clin Chem* 1984;30:1807–8.
6. Boyanton BL, Blick KE. Stability studies of twenty-four analytes in human plasma and serum. *Clin Chem* 2002;48:2242–7.
7. Bakker AJ, Mirchi B, Dijkstra JT, Reitsma F, Syperda H, Zijlstra A. IFCC method for lactate dehydrogenase measurement in heparin plasma is unreliable. *Clin Chem* 2003;49:662–4.
8. Bakker AJ. Reliability of IFCC method for lactate dehydrogenase in heparin plasma. *Clin Chem* 2003;49:1227.
9. Herzum I, Bunder R, Renz H, Wahl HG. Reliability of IFCC method for lactate dehydrogenase measurement in lithium-heparin plasma samples. *Clin Chem* 2003;49:2094–6.
10. Lum G, Gambino SR. A comparison of serum versus heparinized plasma for routine chemistry tests. *Am J Clin Pathol* 1974;61:108–13.
11. Sacks DB, Brun DE, Goldstein DE, MacLaren NK, McDonald JM, Parrott M. Guidelines and recommendations for laboratory analysis in the diagnosis and management of diabetes mellitus. *Clin Chem* 2002;48:436–72.

Rodney R. Miles<sup>1</sup>  
Richard F. Roberts<sup>2</sup>  
Angelica R. Putnam<sup>1</sup>  
William L. Roberts<sup>1,2\*</sup>

<sup>1</sup> Department of Pathology  
University of Utah  
Health Sciences Center  
Salt Lake City, UT

<sup>2</sup> ARUP Institute for Clinical  
and Experimental Pathology  
Salt Lake City, UT

\*Address correspondence to this author at: ARUP Laboratories, 500 Chipeta Way, Salt Lake City, UT 84108. Fax 801-584-5207; e-mail william.roberts@aruplab.com.

DOI: 10.1373/clinchem.2004.036533

# Rapid Determination of $\alpha$ -Fetoprotein Gene Promoter Mutations in Hereditary Persistence of $\alpha$ -Fetoprotein

To the Editor:

Hereditary persistence of  $\alpha$ -fetoprotein (HPAFP) is an autosomal inherited disorder in which AFP is persistent in adult life. Since the description of the first case in 1983

(1), this clinically benign disorder has been reported in 11 unrelated families [Ref. (2) and references therein]. The molecular mechanism has been identified in four unrelated families (2–4). It has been related to a  $-119\text{G}>\text{A}$  substitution in the distal hepatocyte nuclear factor-1 binding site of the AFP gene promoter in three families (2–4) and to a  $-55\text{C}>\text{A}$  substitution in the proxi-

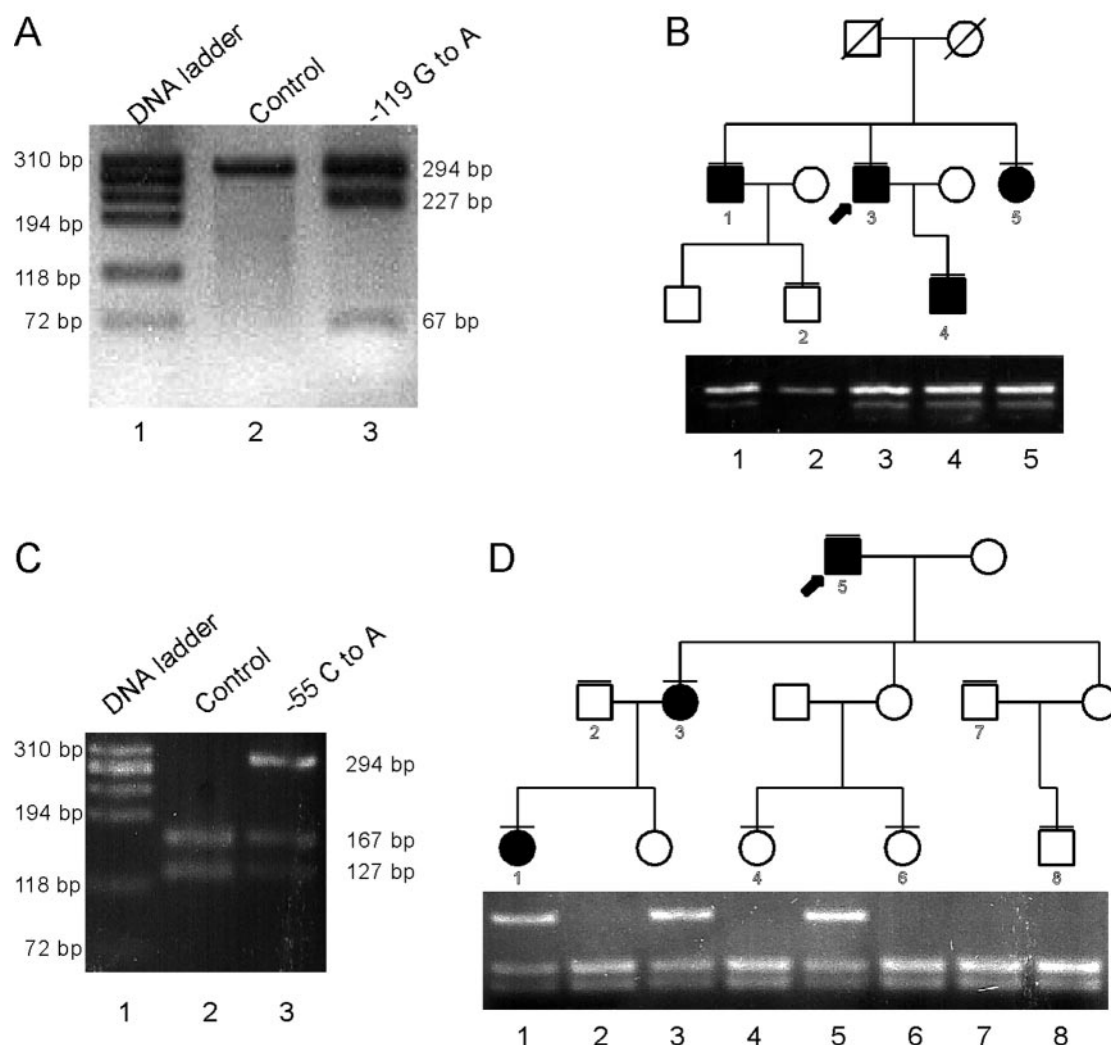

Fig. 1. RFLP screening of  $-119\text{G}>\text{A}$  and  $-55\text{C}>\text{A}$  mutations.

(A), identification by RFLP analysis of the  $-119\text{G}>\text{A}$  mutation. Electrophoresis of the *Psh*AI digest of PCR products from a control individual (lane 2) and the proband (lane 3). Lane 1, DNA ladder ( $\phi\text{X174DNA-HaeIII}$  digest). The control shows one band, corresponding to the WT uncut allele (294 bp). The proband shows three bands, corresponding to the WT uncut allele and to the digested mutant allele (227 + 67 bp). (B), pedigree of family 1. Closed symbols indicate the individuals with increased serum AFP. Symbols with lines above them indicate deceased individuals.  $\square$  and  $\circ$  indicate deceased individuals. Arrow indicates the proband. The affected members show three bands (WT uncut and digested, mutant alleles). The unaffected member shows one band (WT uncut allele). (C), identification by RFLP analysis of the  $-55\text{C}>\text{A}$  mutation. Electrophoresis of the *Spe*I digest of PCR products from a control individual (lane 2) and the proband (lane 3). Lane 1, DNA ladder ( $\phi\text{X174DNA-HaeIII}$  digest). The control shows two bands, corresponding to the WT digested allele (167 + 127 bp). The proband shows three bands, corresponding to the WT digested allele and to the uncut mutant allele (294 bp). (D), pedigree of family 2. The affected members show three bands (WT digested and uncut mutant allele). The unaffected members show two bands (WT digested allele). Symbols are the same as in panel B.
